# Supplementary material for: Profiling the Proteome of Cyst Nematode-Induced Syncytia on Tomato Roots
Source: MDPI journal article supplement (doi:10.3390/ijms222212147), 2021-11-10
Supplement: s1 [file s1]

Table S3. Primers used in the qRT-PCR reactions.

| Gene                                               | Sequences (5' – 3')                                        |
|----------------------------------------------------|------------------------------------------------------------|
| Acid phosphatase                                   | F: CGATGTCGCTTTTGGGTGCGATA<br>R: TGGTGCTTTTCCTTCTCTCGT     |
| lipid desaturase; cevi19                           | F: TCAAGGTTGTGTTTGCACCG<br>R: CCTGTGTTTGCATGGTGACG         |
| trans-cinnamate 4-monooxygenase, cyp73A            | F: GCTTAGACCATTCCTTGAGAGGG<br>R: CCATTTTCAGCCATTAGTTTCCTTC |
| cytochrome P450                                    | F: ACGATTGCAGGAAAAAGGTACT<br>R: CACCAACAGCTTCAACGCC        |
| defensin protein, DEFL1                            | F: TGCTTGTTATGGCTACTGAAATGG<br>R: ACGATGGCTCAACGACTCAC     |
| Deoxyhypusine synthase                             | F: GCCAAGACTGTGAAGGTGCATT<br>R: ATATGTGTGGTCGGAAGGACA      |
| Glutathione transferase                            | F: ATGCAAGAAAGACATGGGCA<br>R: TCCATACACCTTTTCACCCATGA      |
| Isocitrate lyase, LEU18678                         | F: CTGCTGCTATGGGAAAAGGTGT<br>R: TTTGTTGCCCCAGTCCTTGT       |
| Major latex-like protein                           | F: TGGAGGTTAAGTGTGGAGGAC<br>R: TAACCTTAACTTTTCCATCATGGGT   |
| organ-specific protein S2-like                     | F: TCCATGCACCAAGCAAATATCAA<br>R: TGCTGCTACCATAACAAGGCAA    |
| Stress responsive A/B barrel domain family protein | F: TTGTCAAGTCATTTGTTTGGGGAA<br>R: CAGTGGCAAAAGTGGCTGAA     |
| SAND                                               | F: TTGCTTGGAGGAACAGACG<br>R: GCAAACAGAACCCCTGAATC          |
| RPL8                                               | F: CCGAAGGAGCTGTTGTTTGTGA<br>R: ACCTGACCAATCATAGCACGA      |
